# Supplementary material
Source: MDPI journal article supplement (https://www.mdpi.com/2073-4395/14/5/1059)
Supplement: s1 [file s1]

## Supplementary Materials

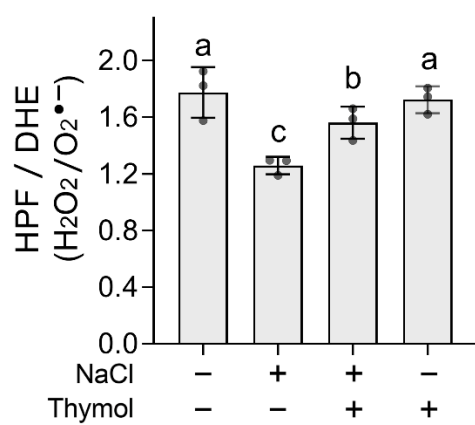

**Figure S1.** Effect of thymol on  $\text{H}_2\text{O}_2/\text{O}_2^{\bullet-}$  in the roots of Chinese cabbage seedlings under saline stress. The  $\text{H}_2\text{O}_2$  content and  $\text{O}_2^{\bullet-}$  content are indicated by the relative fluorescent density of HPF and DHE, respectively.
